# Supplementary material for: Twelve week liraglutide or sitagliptin does not affect hepatic fat in type 2 diabetes: a randomised placebo-controlled trial
Source: PubMed Central journal article supplement (PMC6518065; doi:10.1007/s00125-016-4100-7), 2016-09-15

**ESM Figure 1: flow chart**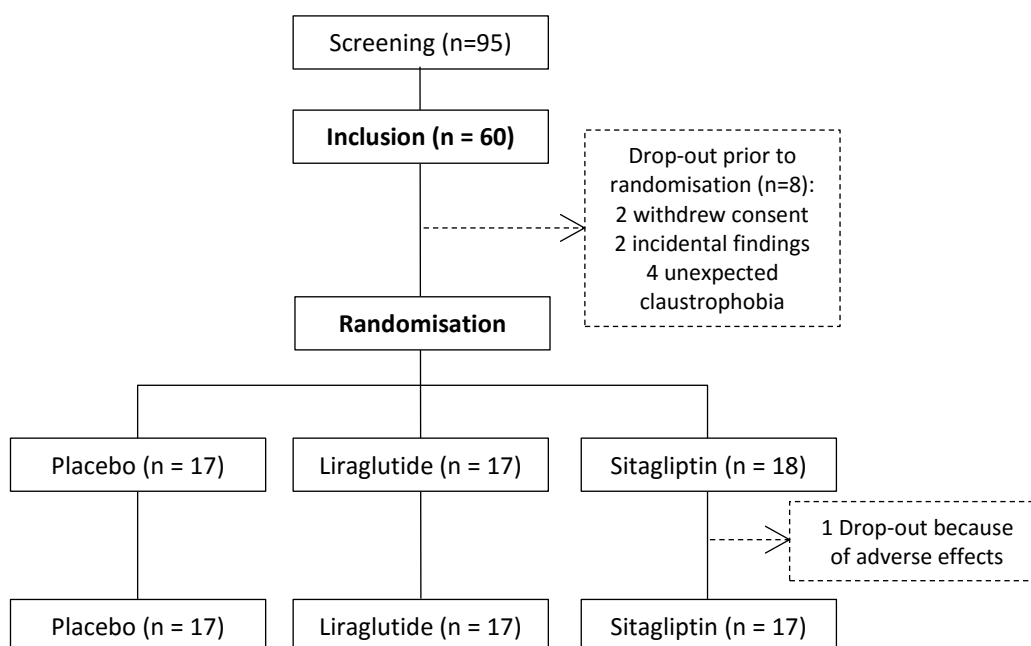

Supplement: 125_2016_4100_MOESM1_ESM.pdf [file 125_2016_4100_MOESM1_ESM.pdf]
